# Supplementary material
Source: publisher figshare collection journal article supplement (https://acs.figshare.com/ndownloader/files/5162506)
Supplement: Supplementary file 1 [file 5162506]

Supporting Information:

Sensing Capabilities of Colloidal Gold Modified with a Self-Assembled Monolayer of a Glucose-Carrying Polymer Chain on a Glass Substrate

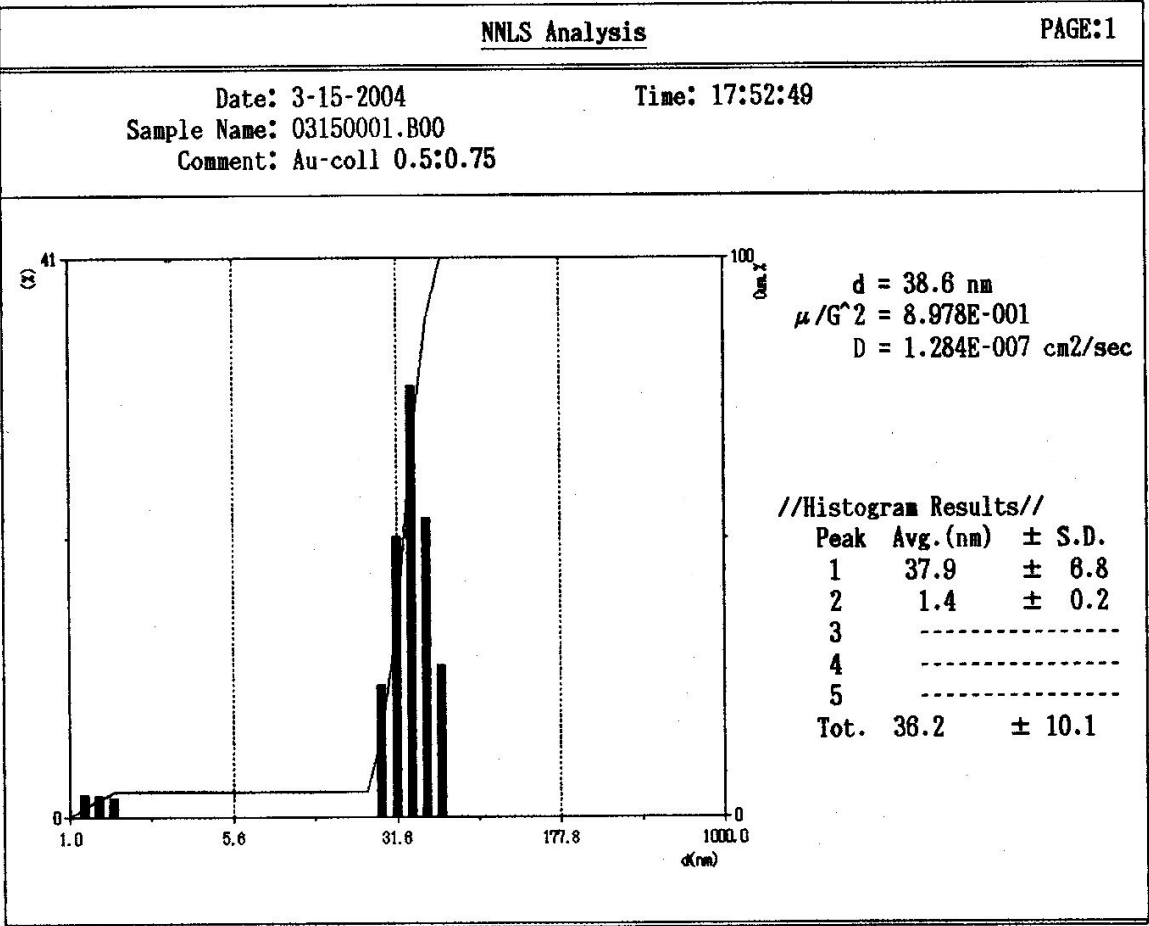

Supplement Figure 1: DLS data of the colloidal Au.

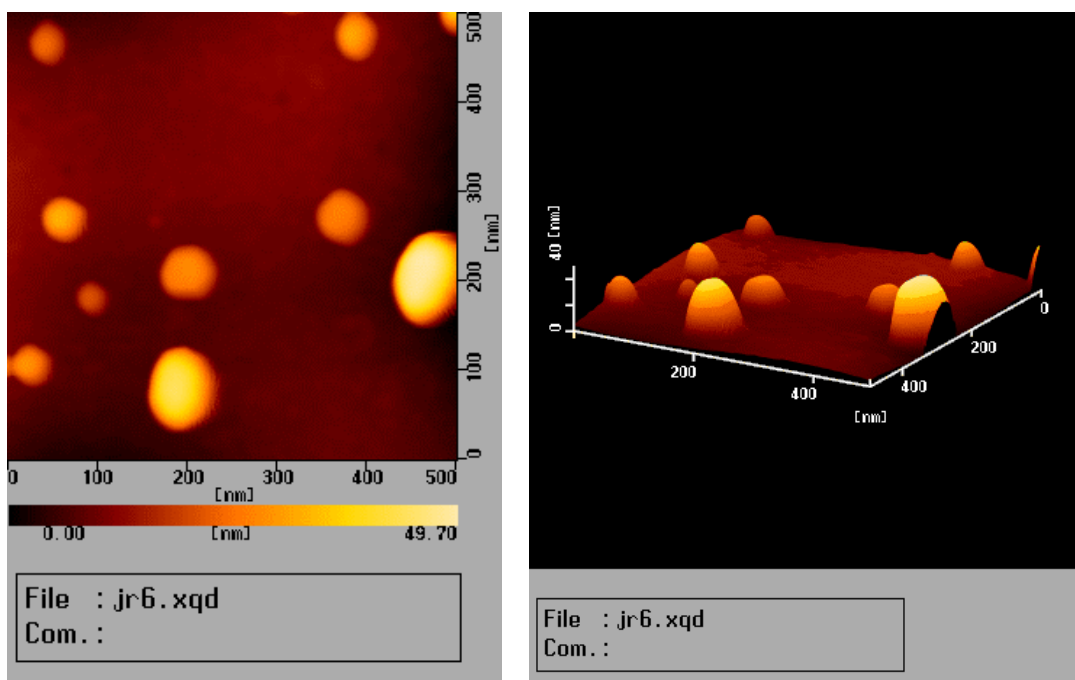

**Supplement Figure 2:** Photos of the colloidal Au-fixed glass substrate taken by AFM.

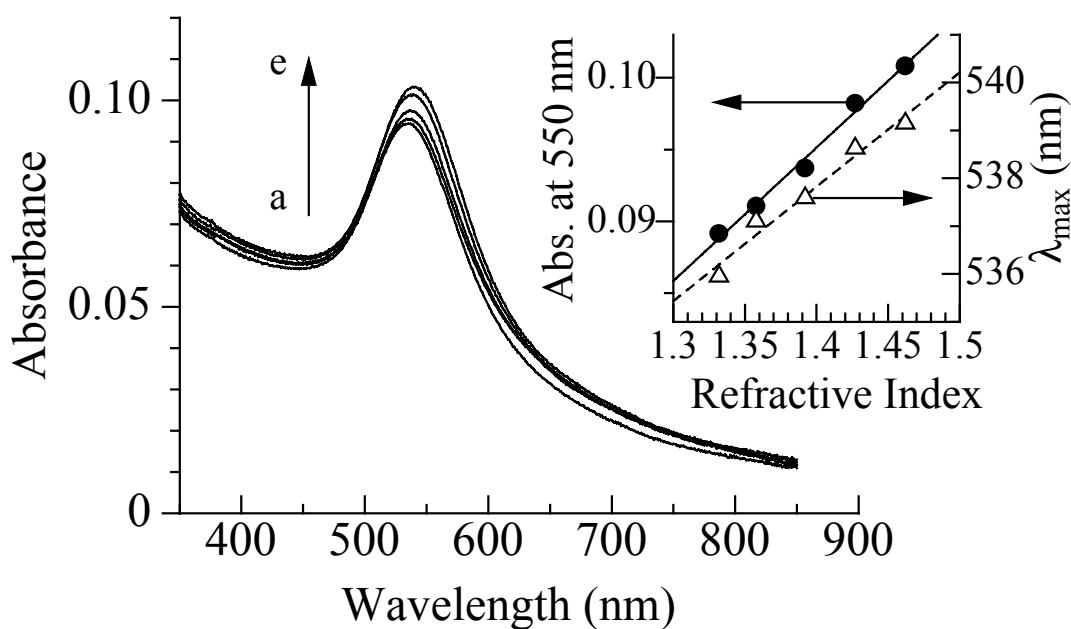

**Supplement Figure 3:** Absorbance spectra of Polymer-1-modified Au colloids on glass immersed in various solvents at 25 °C: (a) water ( $n = 1.332$ ); (b) ethanol ( $n = 1.360$ ); (c) 3 : 1 (v/v) ethanol-toluene ( $n = 1.392$ ); (d) 1 : 1 (v/v) ethanol-toluene ( $n = 1.427$ ); (e) 1 : 3 (v/v) ethanol-toluene ( $n = 1.462$ ).

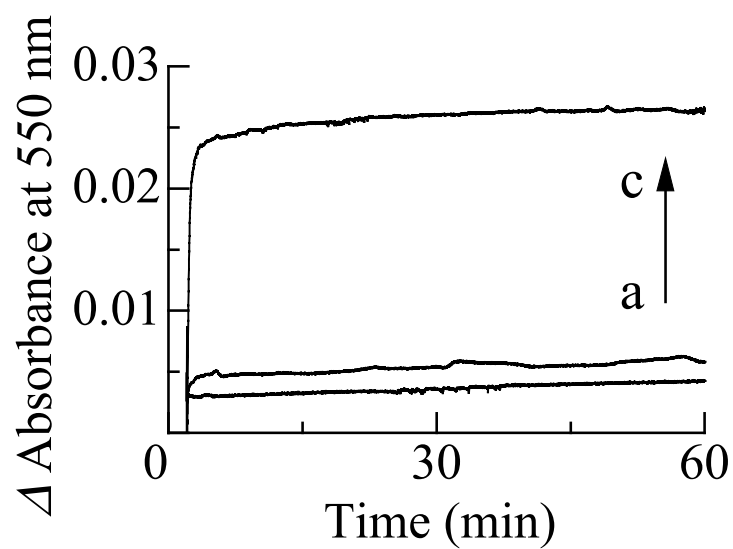

**Supplement Figure 4:** Absorbance change after contact of proteins with PMA SAM. The absorbance was monitored at 550 nm. BSA (a), Con A (b), and Lysozyme (c). [BSA] = [Con A] = [Lysozyme] = 0.2 mg/mL.
